# Supplementary material for: Hepatic Regulator of G Protein Signaling 6 (RGS6) drives non-alcoholic fatty liver disease by promoting oxidative stress and ATM-dependent cell death
Source: PubMed Central journal article supplement — Redox Biol. 2021 Aug 28;46:102105. doi: 10.1016/j.redox.2021.102105 (PMC8446788; doi:10.1016/j.redox.2021.102105), 2021-08-28
Supplement: mmc1.pdf [file mmc1.pdf]

Data Supplement To:

**Title: Hepatic Regulator of G Protein Signaling 6 (RGS6) drives non-alcoholic fatty liver disease by promoting oxidative stress and ATM-dependent cell death**

Red = ATM Protein; Blue = RGS6; Surface is shown for interacting AA of RGS6

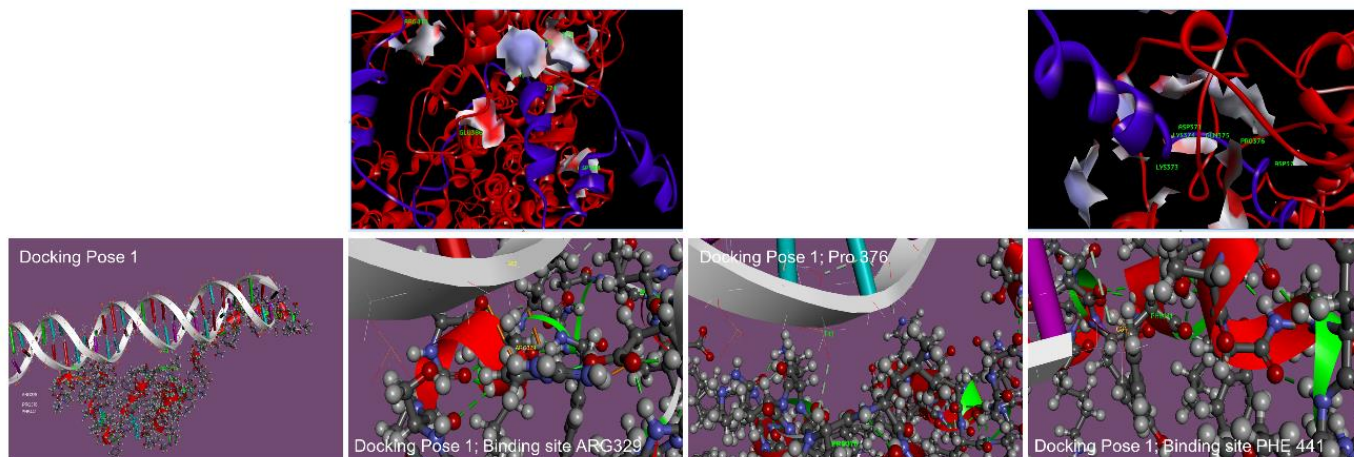

**Figure S1** – *In silico* simulation of the ATM-RGS6 complex. Top images: Red = ATM protein; Blue = RGS6 protein. Key RGS6 residues predicted to support the ATM-RGS6 interaction are highlighted in green. Bottom images: RGS6/ATM complex docked on DNA.

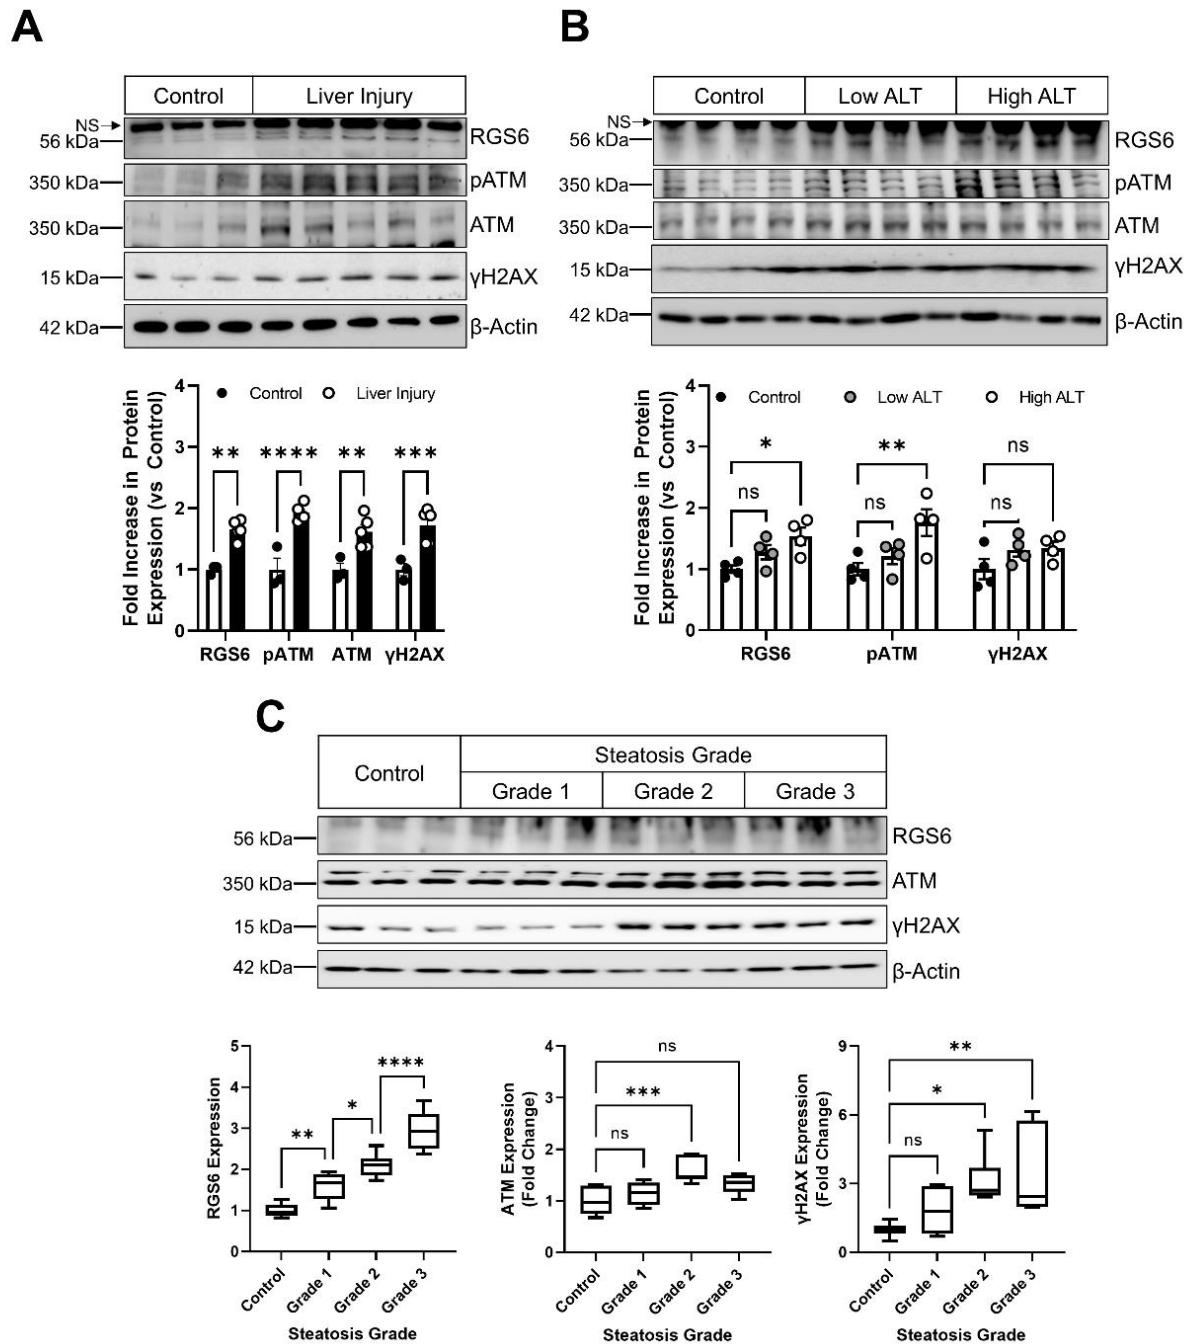

**Figure S2** – RGS6 is upregulated in the livers of patients with hepatic dysfunction. (A) Immunoblotting for RGS6, pATM/ATM, and  $\gamma$ H2AX, in control (n=3) and liver injury (n=5) samples. (B) RGS6, pATM/ATM, and  $\gamma$ H2AX in liver injury samples stratified based on injury severity (high vs low ALT) (n=4). (C) Immunoblotting for RGS6, ATM, and  $\gamma$ H2AX in NAFLD patient samples stratified by steatosis grade (n=6). Densitometric quantification was performed, and data are presented relative to control.  $\beta$ -Actin is used as a loading control for all immunoblots. Data were analyzed by student's t-test or one-way ANOVA with Sidak's post-hoc test. \* $P$ <0.05, \*\* $P$ <0.01, \*\*\* $P$ <0.001, \*\*\*\* $P$ <0.0001. ns = not significant. Data are presented as mean  $\pm$  SEM.

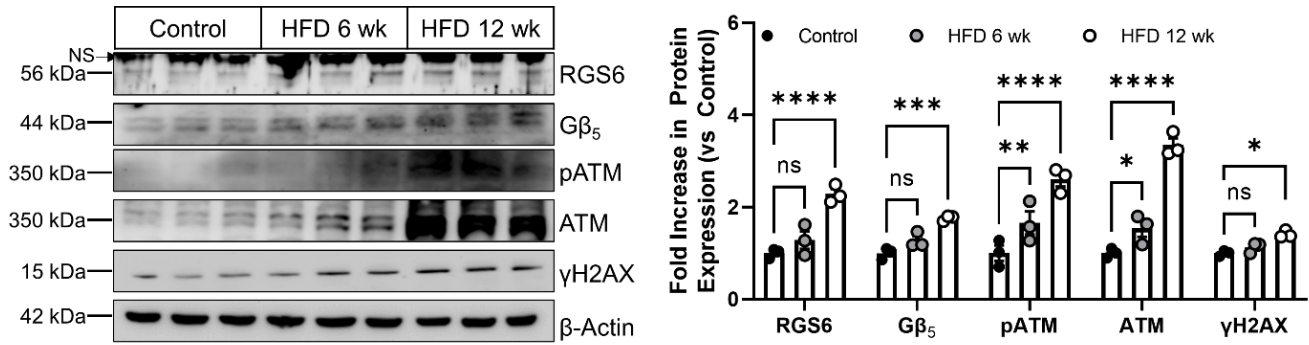

**Figure S3** – Molecular characterization of livers from HFD-fed mice. Mice (n=3) were fed on a HFD for 6 or 12 weeks. Immunoblotting for RGS6, Gβ<sub>5</sub>, pATM/ATM, and γH2AX was performed on liver tissue lysates. A representative western as well as densitometric quantification is shown. β-Actin is used as a loading control for all immunoblots. Data were analyzed by one-way ANOVA with Sidak's post-hoc test. \**P*<0.05, \*\**P*<0.01, \*\*\**P*<0.001, \*\*\*\**P*<0.0001. ns = not significant. Data are presented as mean ± SEM.

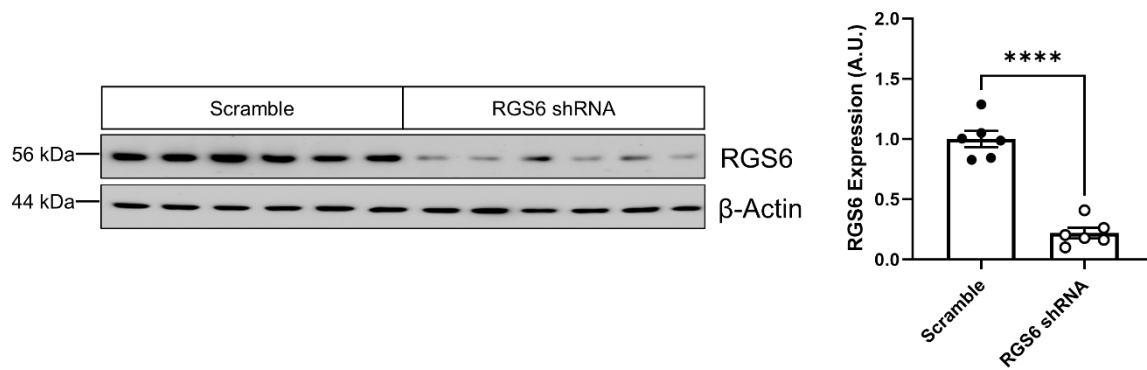

**Figure S4** – Verification of RGS6 knockdown in liver. Scramble or RGS6-targeted shRNA was administered to mice (n=6) via tail vein injection, and immunoblotting for RGS6 was performed on liver tissue lysates. A representative western as well as densitometric quantification is shown.  $\beta$ -Actin is used as a loading control. Data were analyzed by student's t-test. \*\*\*\* $P < 0.0001$ . Data are presented as mean  $\pm$  SEM.

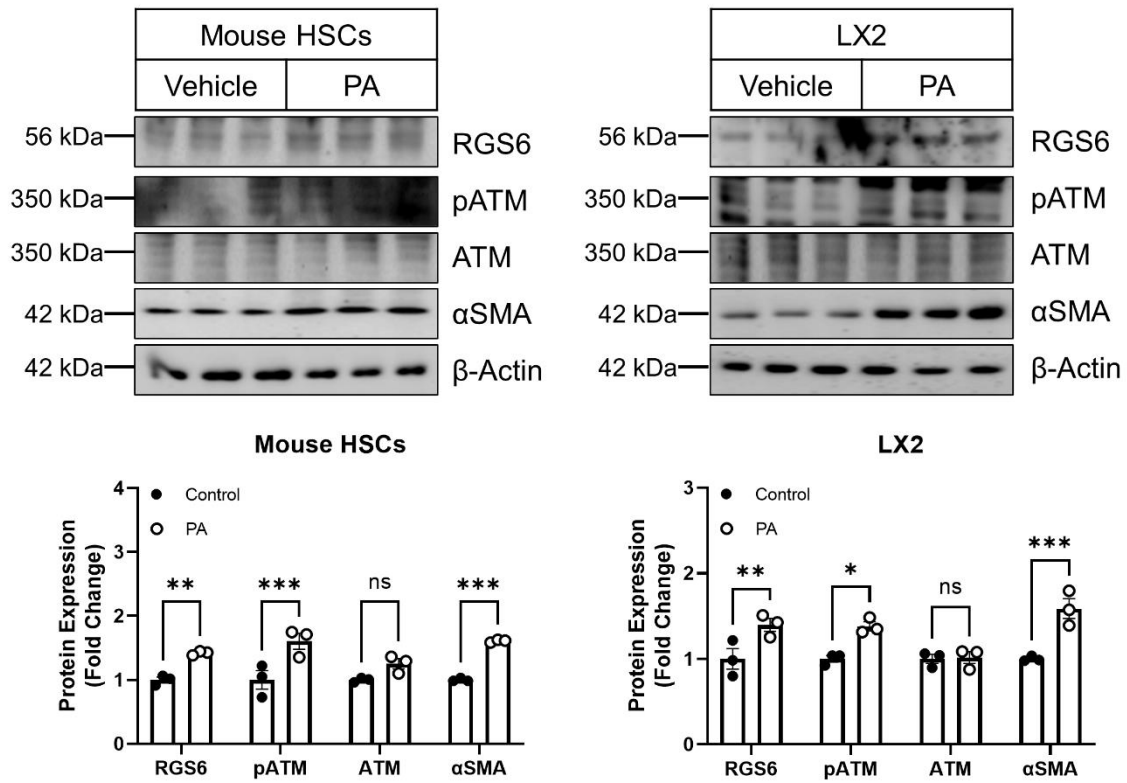

**Figure S5** – Hyperlipidemia results in RGS6 up-regulation in murine and human HSCs. Cells were treated with PA (400  $\mu$ M, 24 h) 24 hours following introduction of scramble or RGS6-targeted shRNA. Immunoblotting was performed probing for RGS6, pATM, ATM and  $\alpha$ SMA (n=3). Immunoblots as well as densitometric quantification are provided.  $\beta$ -Actin is used as a loading control for all immunoblots. Data were analyzed by student's t-test. \* $P$ <0.05, \*\* $P$ <0.01, \*\*\* $P$ <0.001. ns = not significant. Data are presented as mean  $\pm$  SEM.

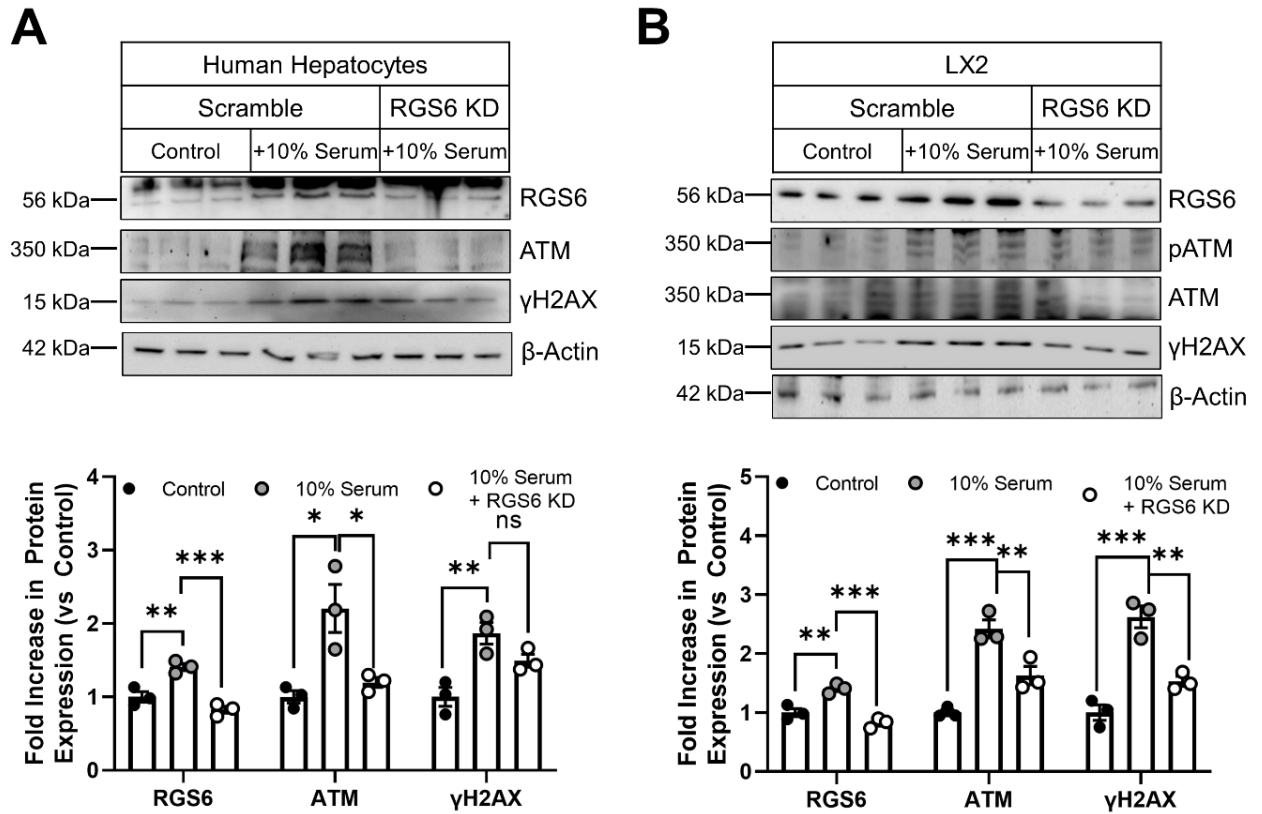

**Figure S6** – RGS6 silencing ameliorates pathological molecular aberrations induced by serum from NAFLD patients. (A) Human hepatocytes (n=3) or (B) LX2 cells (n=3) were treated with 10% serum from NAFLD patients 24 hours following the introduction of scramble or RGS6-targeted shRNA. Immunoblotting for RGS6, pATM/ATM, and γH2AX was performed. Representative immunoblots with corresponding quantification are provided. Data were analyzed by one-way ANOVA with Sidak's post-hoc test. \* $P < 0.05$ , \*\* $P < 0.01$ , \*\*\* $P < 0.001$ . ns = not significant. Data are presented as mean  $\pm$  SEM.

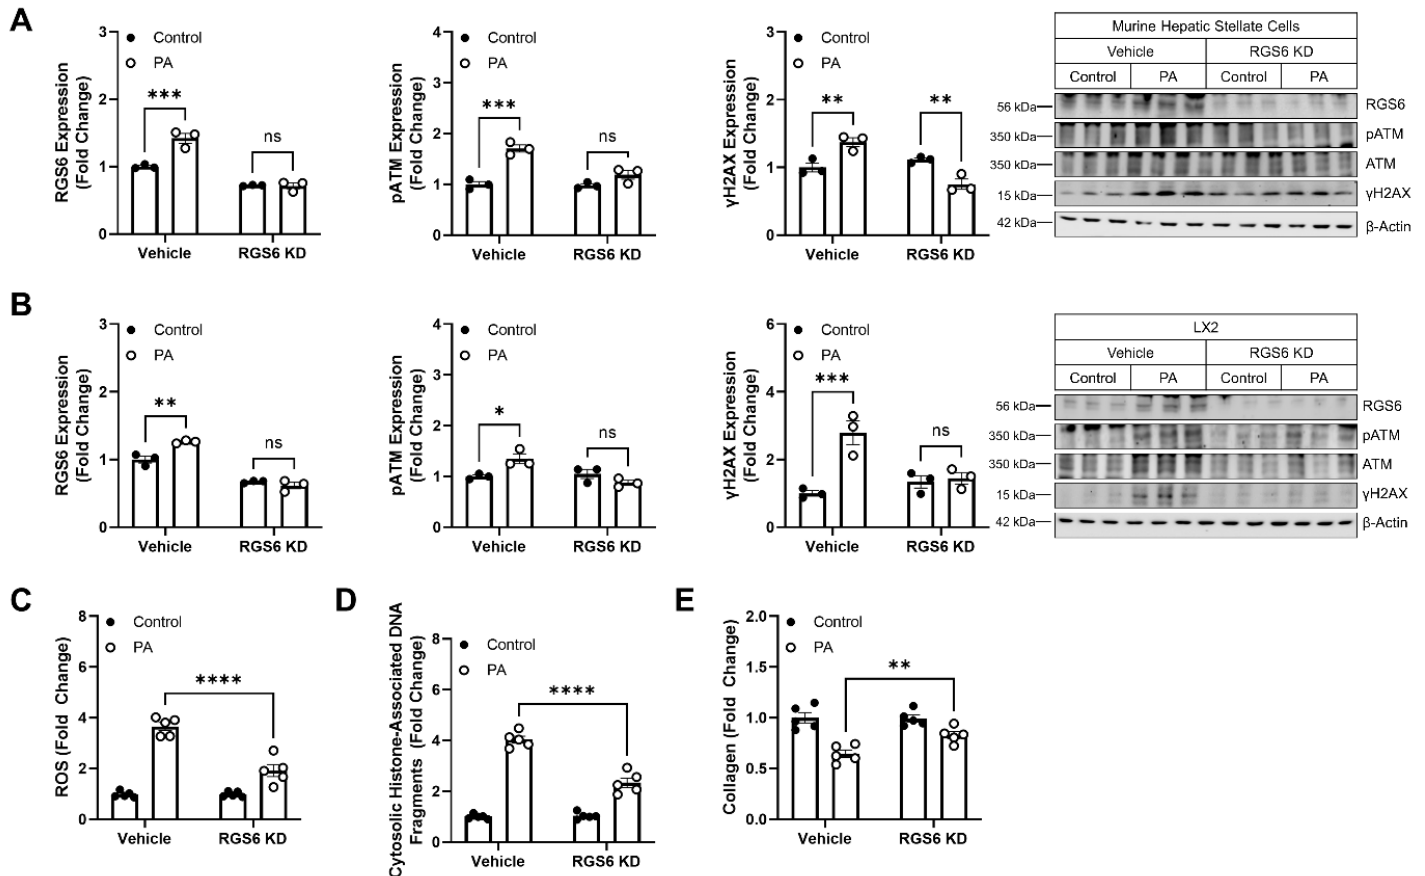

**Figure S7** – RGS6 promotes PA-dependent cytotoxicity and fibrotic remodeling in hepatic stellate cells (HSCs). Cells were treated with PA (400  $\mu$ M, 24 h) 24 hours following the introduction of scramble or RGS6-targeted shRNA. (A) Immunoblotting for RGS6, pATM/ATM, and  $\gamma$ H2AX in murine HSCs. Representative immunoblots with corresponding quantification are provided (n=3). (B) Immunoblotting for RGS6, pATM/ATM, and  $\gamma$ H2AX in human HSC cell line LX2. Representative immunoblots with corresponding quantification are provided (n=3). (C) CM-H<sub>2</sub>DCFDA fluorescence (n=5); (F) cell death (cytoplasmic histone-associated DNA fragments; n=5); and collagen production (n=5) in PA-treated LX2 cells. Data were analyzed by two-way ANOVA with Sidak's post-hoc test. \* $P$ <0.05, \*\* $P$ <0.01, \*\*\* $P$ <0.001, \*\*\*\* $P$ <0.0001. ns = not significant. Data are presented as mean  $\pm$  SEM.

**Table S1: Reagent List**

| Company                   | Location           | Reagent                                                    |
|---------------------------|--------------------|------------------------------------------------------------|
| Sigma Chemical            | St. Louis, MO, USA | N-acetyl cysteine (NAC)                                    |
|                           |                    | Ru360                                                      |
|                           |                    | Cyclosporin A                                              |
|                           |                    | CM-H <sub>2</sub> DCFDA                                    |
|                           |                    | Oil Red O                                                  |
|                           |                    | Palmitic acid (PA)                                         |
|                           |                    | Polyethylene glycol-catalase (Peg-Cat)                     |
| Addgene                   | Watertown, MA, USA | pLenti CMV Puro DEST cloning vector                        |
|                           |                    | pMD2.G VSV-G envelope expressing plasmid                   |
|                           |                    | psPAX2                                                     |
| Abcam                     | Cambridge, UK      | Masson Trichrome Stain                                     |
|                           |                    | N-acetyl cysteine (NAC)                                    |
|                           |                    | KU-55933                                                   |
|                           |                    | Protein A/G sepharose                                      |
| Thermo Fisher Scientific  | Waltham, MA, USA   | Sirius Red                                                 |
|                           |                    | MitoSox                                                    |
| Invitrogen                | Carlsbad, CA, USA  | Phusion Hot Start II High-Fidelity PCR Master Mix (F-565S) |
| Takara Bio                | Kyoto, Japan       | Platinum Taq DNA Polymerase High Fidelity                  |
| Sisco Research Laboratory | Mumbai, India      | pMD20-T vector                                             |
|                           |                    | Hematoxylin                                                |
|                           |                    | Eosin                                                      |
|                           |                    | Other regular chemicals                                    |

**Table S2: Antibody List**

| Company                   | Location            | Antibody             | Catalog # | Dilution                 |
|---------------------------|---------------------|----------------------|-----------|--------------------------|
| Abcam                     | Cambridge, UK       | PCNA                 | ab29      | WB (1:1000), IHC (1:200) |
|                           |                     | F4/80                | ab6640    | WB (1:1000), IHC (1:200) |
|                           |                     | ATM                  | ab78      | WB (1:800)               |
|                           |                     | p-ATM                | CST45265  | WB (1:1000)              |
|                           |                     | γH2AX                | ab124781  | WB (1:1000)              |
|                           |                     | γH2AX                | ab26350   | WB (1:1000)              |
|                           |                     | Mouse Secondary-HRP  | ab97023   | WB (1:2000), IHC (1:500) |
|                           |                     | Rabbit Secondary-HRP | ab97051   | WB (1:2000), IHC (1:500) |
|                           |                     | RGS6                 | ab128943  | WB (1:1000), IHC (1:200) |
|                           |                     | GFP                  | ab290     | WB (1:1000), IP (1:200)  |
| Cell Signaling Technology | Danvers, MA, USA    | Actin                | ab8227    | WB (1:1000)              |
|                           |                     | α-SMA                | 19245S    | WB (1:1000)              |
|                           |                     | CD68                 | 76437     | IHC (1:300)              |
| Millipore                 | Burlington, MA, USA | GFP                  | 2956      | WB (1:1000), IP (1:200)  |
|                           |                     | Gβ5                  | ABS1062   | WB (1:800), IHC (1:200)  |
| Thermo Fisher Scientific  | Waltham, MA, USA    | ATM                  | MA123152  | WB (1:1000), IHC (1:250) |
|                           |                     | IRS pS307            | PA1-1054  | WB (1:1000)              |
|                           |                     | IRS pY941            | 44-820G   | WB (1:1000)              |



**Table S3:** Assay Kit List

| Company                                          | Location               | Assay                                                                   | Catalog #           |
|--------------------------------------------------|------------------------|-------------------------------------------------------------------------|---------------------|
| Abcam                                            | Cambridge, UK          | Ca <sup>2+</sup> Flux Assay Kit                                         | ab102505            |
|                                                  |                        | Collagen Assay Kit                                                      | ab222942            |
|                                                  |                        | Hydroxyproline Assay Kit                                                | ab222941            |
|                                                  |                        | Mitochondrial isolation Kit                                             | ab110170            |
|                                                  |                        | Mitochondrial Membrane Potential Assay Kit                              | ab113852            |
|                                                  |                        | Terminal deoxynucleotidyltransferase/UTP Nick-End Labelling (TUNEL) kit | ab206386            |
|                                                  |                        | NAD <sup>+</sup> /NADH assay kit                                        | ab65348             |
|                                                  |                        | Lipid Peroxidation (MDA) Assay Kit                                      | ab23347             |
|                                                  |                        | Liver Lactate/Pyruvate Assay kits                                       | ab65331/<br>ab65342 |
| Roche                                            | San Francisco, CA, USA | Cell Death Detection Kit                                                | C755B93             |
| Erba Mannheim                                    | London, UK             | ALT                                                                     | 120207              |
|                                                  |                        | AST                                                                     | 120204              |
|                                                  |                        | Triglycerides                                                           | 120211              |
| Biomedical Research & Clinical Application (BMR) | Buffalo, NY, USA       | Fatty acid oxidation (FAO) assay                                        | E141                |

**Table S4:** Cell Line List

| Company                                                                                                                                                 | Location            | Cell Line | Catalog # | Culture Conditions                                                                                                                   |
|---------------------------------------------------------------------------------------------------------------------------------------------------------|---------------------|-----------|-----------|--------------------------------------------------------------------------------------------------------------------------------------|
| Merck & Co.                                                                                                                                             | Kenilworth, NJ, USA | HepaRG    | MMHPR116  | 37°C incubator at 5% CO <sub>2</sub> in William's E Medium with GlutaMAX™ Supplement (Thermo Fisher Scientific) with 10% FBS (Gibco) |
| Gift from Dr. Suvro Chatterjee, Vascular Biology Lab, Life Sciences Division, AU-KBC Research Centre, Anna University, Chennai 600044, Tamilnadu, India |                     | Lx2       |           | 37°C incubator at 5% CO <sub>2</sub> in DMEM + 3% FBS                                                                                |

**Table S5: Primer List**

| #  | Names of Primer                                               | Sequence of Primer                   |
|----|---------------------------------------------------------------|--------------------------------------|
| 1  | RGS6 Human isoform 2 full length in pEGFP-N1 Forward XhoI     | 5'ATACTCGAGATGGCTCAAGGATCCGG3'       |
| 2  | RGS6 Human isoform 2 full length in pEGFP-N1 Reverse HindIII  | 5'ATAAAGCTTGGAGGACTGCATCAGGC3'       |
| 3  | RGS6 Human Isoform 2 deletion 30-150aa overlapping Forward    | 5'GCAAAATTGAATATGAAGCAGAAAACCTTAGC3' |
| 4  | RGS6 Human Isoform 2 deletion 30-150aa overlapping Reverse    | 5'TCTGCTTCATATTCAATTTTGCAGTAAACGA3'  |
| 5  | RGS6 Human Isoform 2 deletion 255-315aa overlapping Forward   | 5'CAATCAGGAAATTGTGGGACATAGAGATGAG3'  |
| 6  | RGS6 Human Isoform 2 deletion 255-315aa overlapping Reverse   | 5'ATGTCCCACAATTTCCCTGATTGGTTGGCTGA3' |
| 7  | RGS6 Human Isoform 2 Short, deletion 1-139aa Forward          | 5'ATACTCGAGATGCAAAATAAAGCAAGGCTG3'   |
| 8  | RGS6 Human Isoform 2 Short, deletion 1-139aa Reverse          | 5'ATAAAGCTTGGAGGACTGCATCAGGC3'       |
| 9  | RGS6 Human Isoform 2 deletion 301-400aa overlapping Forward   | 5'ACCCTTTGATAAACCTGGATTCTCACAGC3'    |
| 10 | RGS6 Human Isoform 2 deletion 301-400aa overlapping Reverse   | 5'GAATCCAGGTTTATCAAAGGGTCATATTC3'    |
| 11 | RGS6 Human Isoform 2 deletion 376-456aa overlapping Forward   | 5'TTAAGAAACAAGGAAAGTCGCTGGCGGGC3'    |
| 12 | RGS6 Human Isoform 2 deletion 376-456aa overlapping Reverse   | 5'AGCGACTTTCCCTTGTTTCTTAAGATCTTG3'   |
| 13 | RGS6 Human Isoform 2 deletion 326-456aa overlapping Forward   | 5'GCAAAGAGCCCCGAAAGTCGCTGGCGG3'      |
| 14 | RGS6 Human Isoform 2 deletion 326-456aa overlapping Reverse   | 5'AGCGACTTTCGGGCTCTTTGCTCATCTC3'     |
| 15 | RGS6 Human Isoform 2 Point mutation D379Y overlapping Forward | 5'CAACCCCTACAGTATGTGGC3'             |
| 16 | RGS6 Human Isoform 2 Point mutation D379Y overlapping Reverse | 5'TCTTGCCACATACTGTAGG3'              |
| 17 | RGS6 Human Isoform 2 Point mutation D379V Forward             | 5'AACCCCTACAGTTGTGGCC3'              |
| 18 | RGS6 Human Isoform 2 Point mutation D379V Reverse             | 5'CTCTTGCCACAACCTGTAG3'              |
| 19 | RGS6 Human Isoform 2 Point mutation D348Y Forward             | 5'CAGGTGGGGCGGTACCAGTTT3'            |
| 20 | RGS6 Human Isoform 2 Point mutation D348Y Reverse             | 5'TAGAAACTGGTACCGCCCCA3'             |
| 21 | RGS6 Human Isoform 2 Point mutation D371Y Forward             | 5'GCTGGCTGTCCAATATCTTA3'             |
| 22 | RGS6 Human Isoform 2 Point mutation D371Y Reverse             | 5'GTTTCTTAAGATATTGGACAGCC3'          |
| 23 | RGS6 Human Isoform 2 Point mutation K374I Forward             | 5'CCAAGATCTTAAGATACACCC3'            |
| 24 | RGS6 Human Isoform 2 Point mutation K374I Reverse             | 5'CCTGTAGGGTTGTATCTTAAG3'            |
| 25 | RGS6 Human Isoform 2 Point mutation R419I Forward             | 5'GTCAAAGATGGAGGGATATATACAT3'        |
| 26 | RGS6 Human Isoform 2 Point mutation R419I Reverse             | 5'GGCGTCTTCAAATGTATATATCCCTCCATC3'   |
| 27 | RGS6 Human isoform 2-point mutation N401V overlapping Forward | 5'AAGTGCAATCGTCCTGGATT3'             |
| 28 | RGS6 Human isoform 2-point mutation N401V overlapping Reverse | 5'GAGAATCCAGGACGATTGCA3'             |
| 29 | RGS6 Mouse isoform2 full length Forward XhoI                  | 5'-ATACTCGAGATGGCTCAGGGTCCGGG-3'     |
| 30 | RGS6 Mouse isoform2 full length Reverse HindIII               | 5'ATAAAGCTTGGAGGACTGCATCAGGC3'       |

**Table S6:** Amino acid interaction from ATM-RGS6 simulation

| Protein                 | ATM     | RGS6   | Frequency of interaction during simulation |
|-------------------------|---------|--------|--------------------------------------------|
| Position of Amino Acids | ASP2822 | LYS374 | 21                                         |
|                         | ARG2912 | ASP379 | 22                                         |
|                         | GLU2778 | ARG419 | 24                                         |
|                         | ARG1973 | ASP348 | 27                                         |
|                         | ARG2792 | ASP379 | 33                                         |
|                         | ARG2792 | ASP371 | 39                                         |

**Table S7:** Clinical Data for control, NAFLD (steatosis grade 1-3) and NAFLD + DM patients whose liver tissue was utilized for the human datasets generated in this study. [BMI, body mass index; LDL, low-density lipoprotein cholesterol; HDL, high-density lipoprotein cholesterol; TG, triglycerides; AST, aspartate aminotransferase; ALT, alanine aminotransferase; FBG, fasting blood glucose; HOMA-IR, Homeostatic Model Assessment for Insulin Resistance; HbA1c, hemoglobin A1c]

|                          | Controls      | Steatosis (Grade 1-3) | Steatosis + Diabetes Mellitus | P-value            |
|--------------------------|---------------|-----------------------|-------------------------------|--------------------|
| <i>N</i>                 | 8             | 24                    | 18                            | -                  |
| BMI (kg/m <sup>2</sup> ) | 20.98 ± 0.62  | 28.12 ± 0.53          | 28.63 ± 0.68                  | <b>P&lt;0.0001</b> |
| Fat mass (kg)            | 17.74 ± 0.82  | 21.01 ± 0.76          | 20.91 ± 0.84                  | P=0.064            |
| Alcohol (g/day)          | 4.87 ± 0.89   | 3.21 ± 0.24           | 3.19 ± 0.16                   | <b>P=0.009</b>     |
| Cholesterol (mg/dl)      | 161.38 ± 8.77 | 174.1 ± 4.57          | 179.11 ± 4.98                 | P=0.18             |
| LDL (mg/dl)              | 91.38 ± 2.96  | 103.46 ± 3.86         | 108.7 ± 4.68                  | P=0.13             |
| HDL (mg/dl)              | 51.23 ± 1.84  | 49.54 ± 1.91          | 47.79 ± 1.95                  | P=0.61             |
| TG (mg/dl)               | 97.89 ± 3.04  | 151.9 ± 3.9           | 152.47 ± 5.76                 | <b>P&lt;0.0001</b> |
| AST (IU/l)               | 19.88 ± 0.86  | 30.73 ± 1.01          | 32.58 ± 1.54                  | <b>P&lt;0.0001</b> |
| ALT (IU/l)               | 15.94 ± 0.68  | 33.71 ± 1.13          | 37.54 ± 1.54                  | <b>P&lt;0.0001</b> |
| FBG (mg/dl)              | 92.55 ± 2.88  | 111.35 ± 3.34         | 111.93 ± 3.48                 | <b>P=0.0069</b>    |
| Insulin (μ IU/ml)        | 6.59 ± 0.3    | 11.1 ± 0.63           | 12.32 ± 0.59                  | <b>P&lt;0.0001</b> |
| HOMA-IR                  | 1.61 ± 0.11   | 3.09 ± 0.084          | 3.12 ± 0.11                   | <b>P&lt;0.0001</b> |
| C-Peptide (ng/ml)        | 1.48 ± 0.096  | 2.92 ± 0.058          | 3.08 ± 0.078                  | <b>P&lt;0.0001</b> |
| HbA1c (%)                | 5.34 ± 0.12   | 5.91 ± 0.98           | 6.13 ± 0.076                  | <b>P=0.0002</b>    |
